# Supplementary material for: Patient-specific total hip arthroplasty is superior to conventional methods for Crowe III and IV adult developmental hip dysplasia: a randomized controlled trial
Source: PubMed Central journal article supplement — Ann Transl Med. 2021 Feb;9(3):212. doi: 10.21037/atm-20-3488 (PMC7940928; doi:10.21037/atm-20-3488), 2021-02
Supplement: atm-09-03-212-dss.pdf [file atm-09-03-212-dss.pdf]

## Data Sharing Statement

|                     |                                                                                                                                                    |                                                                                                                           |
|---------------------|----------------------------------------------------------------------------------------------------------------------------------------------------|---------------------------------------------------------------------------------------------------------------------------|
| <b>Article Info</b> | <a href="http://dx.doi.org/10.21037/atm-20-3488">http://dx.doi.org/10.21037/atm-20-3488</a>                                                        |                                                                                                                           |
| <b>Item</b>         | <b>Question</b>                                                                                                                                    | <b>Authors' Response<br/>(place "-" if not applicable)</b>                                                                |
| 1                   | Would you like to share data collected for your study to others?                                                                                   | Yes                                                                                                                       |
| 2                   | If not, would you like to share the reason for your decision?                                                                                      | -                                                                                                                         |
| 3                   | What data in particular will be shared?                                                                                                            | Primary statistical data of cases in this RCT.                                                                            |
| 4                   | Any other documents will be share? Such as study protocol, statistical analysis plan, informed consent form, clinical study report, analytic code. | Original results of the RCT original statistics analyzed by SPSS; and animation of the design process for a typical case. |
| 5                   | When will data availability begin?                                                                                                                 | From the publication date.                                                                                                |
| 6                   | When will data availability end?                                                                                                                   | 18 months within the publication date, since the technique or survival date may be updated over time.                     |
| 7                   | To whom will you share the data?                                                                                                                   | Doctors interested in joint surgery and digital orthopedics.                                                              |
| 8                   | For what type of analysis or purpose?                                                                                                              | Analyze whether the new technique (PSI-DDH-THA) has advantages over traditional surgical method.                          |
| 9                   | How or where can the data/documents be obtained?                                                                                                   | Emails could be sent to the address below to obtain the shared data:<br>dr_zhongda@126.com.                               |
| 10                  | Any other restrictions?                                                                                                                            | We may balance the potential benefits and risks for each request and then provide the data that could be shared.          |
